# Supplementary figures and images for: Room-Temperature Formation of Hard BCx Films by Low Power Magnetron Sputtering
Source: MDPI journal article supplement (doi:10.3390/app11219896), 2021-10-22

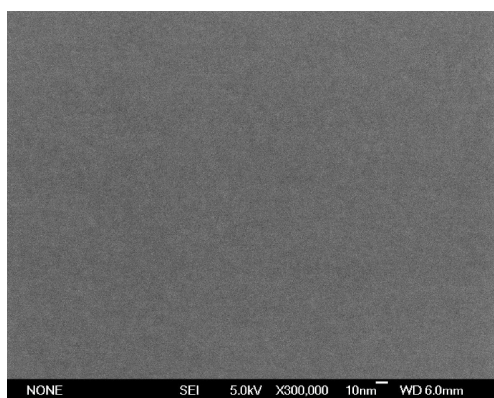

(a)

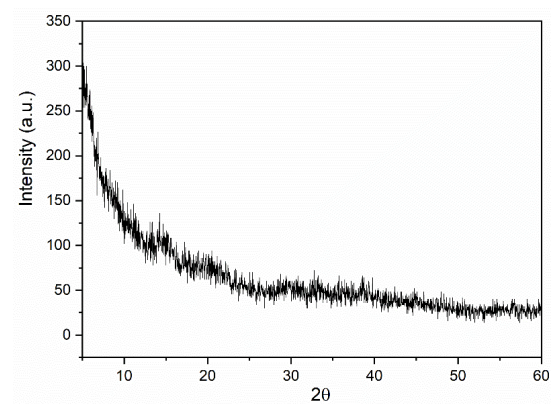

(b)

**Figure S1.** Typical (a) SEM image and (b) XRD pattern of BC<sub>x</sub> film.

Supplement: s1 [file s1]
